# Supplementary material for: Cell fate inclination within 2-cell and 4-cell mouse embryos revealed by single-cell RNA sequencing
Source: HighWire-hosted journal article supplement (doi:10.1101/gr.177725.114), 2014-08-05
Supplement: suppl-figures_tables-07-29.docx [file suppl-figures_tables-07-29.docx]

Figure S1. The average density of SMART-seq reads across the entire length the transcripts.


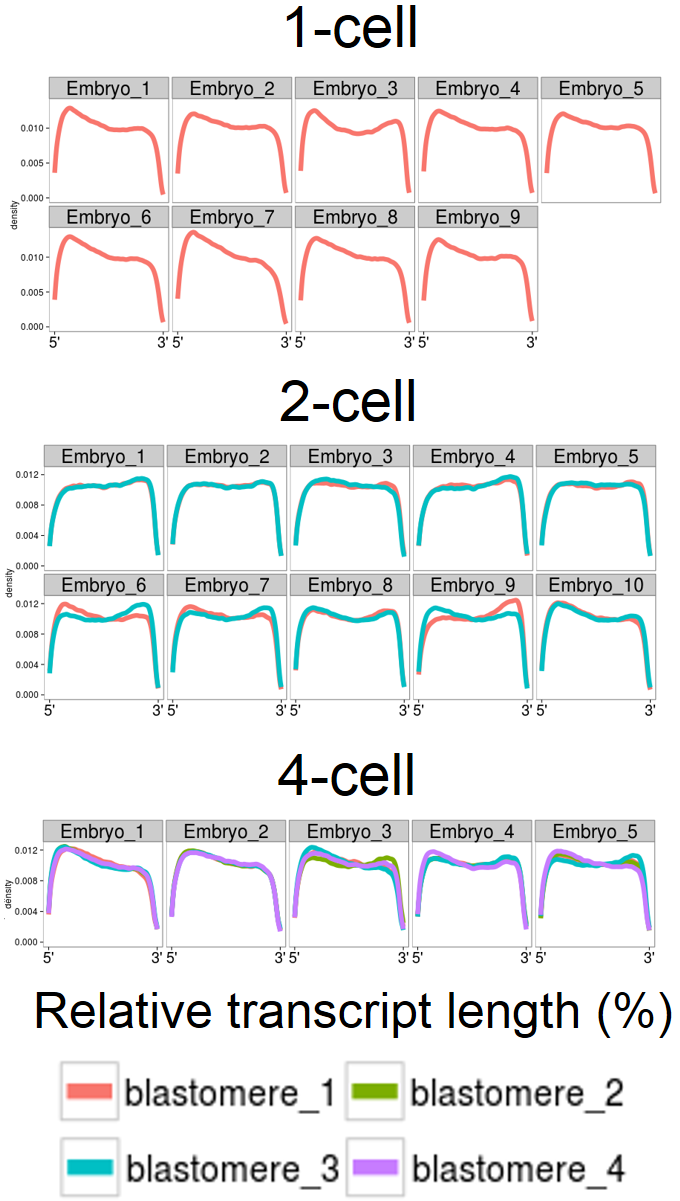


Figure S2. The RNA-seq data of Pou5f1 visualized in single-cell genome browser (http://singlecell.cepbrowser.org).


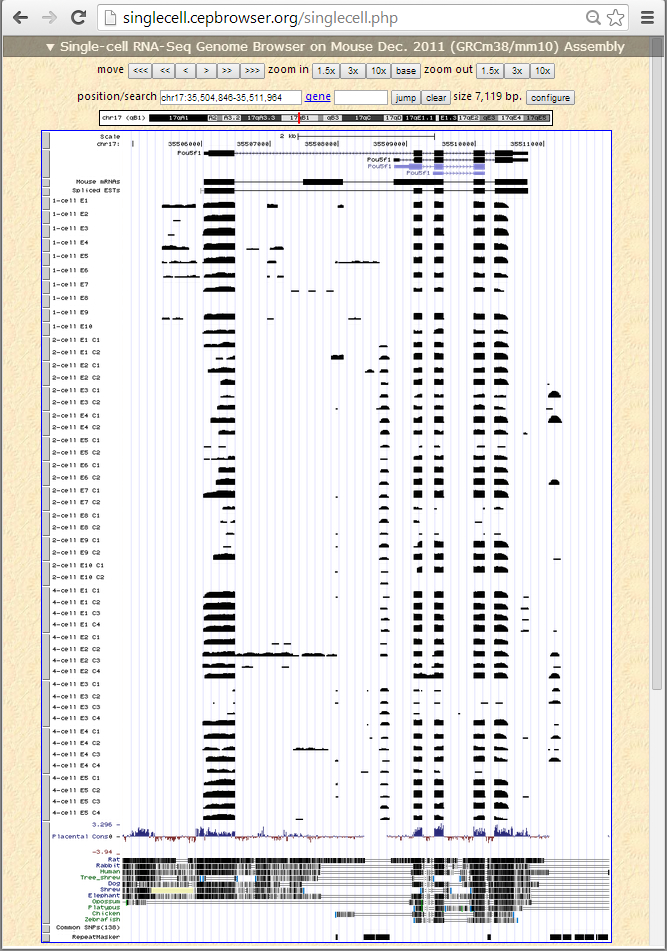


Figure S3. Clustering of single cells. Various CV cutoffs (1st column) were applied to select genes (2nd column). The selected genes are the dots above the line (representing CV) in the scatterplots (3rd column) of standard deviation (y-axis) vs. mean expression level (x-axis). The resulting clustering dendrogram of cells using the selected genes (4th column) shows progressive separation of sister blastomeres as the CV increases. Ei-Bj: blastomere j of embryo i.


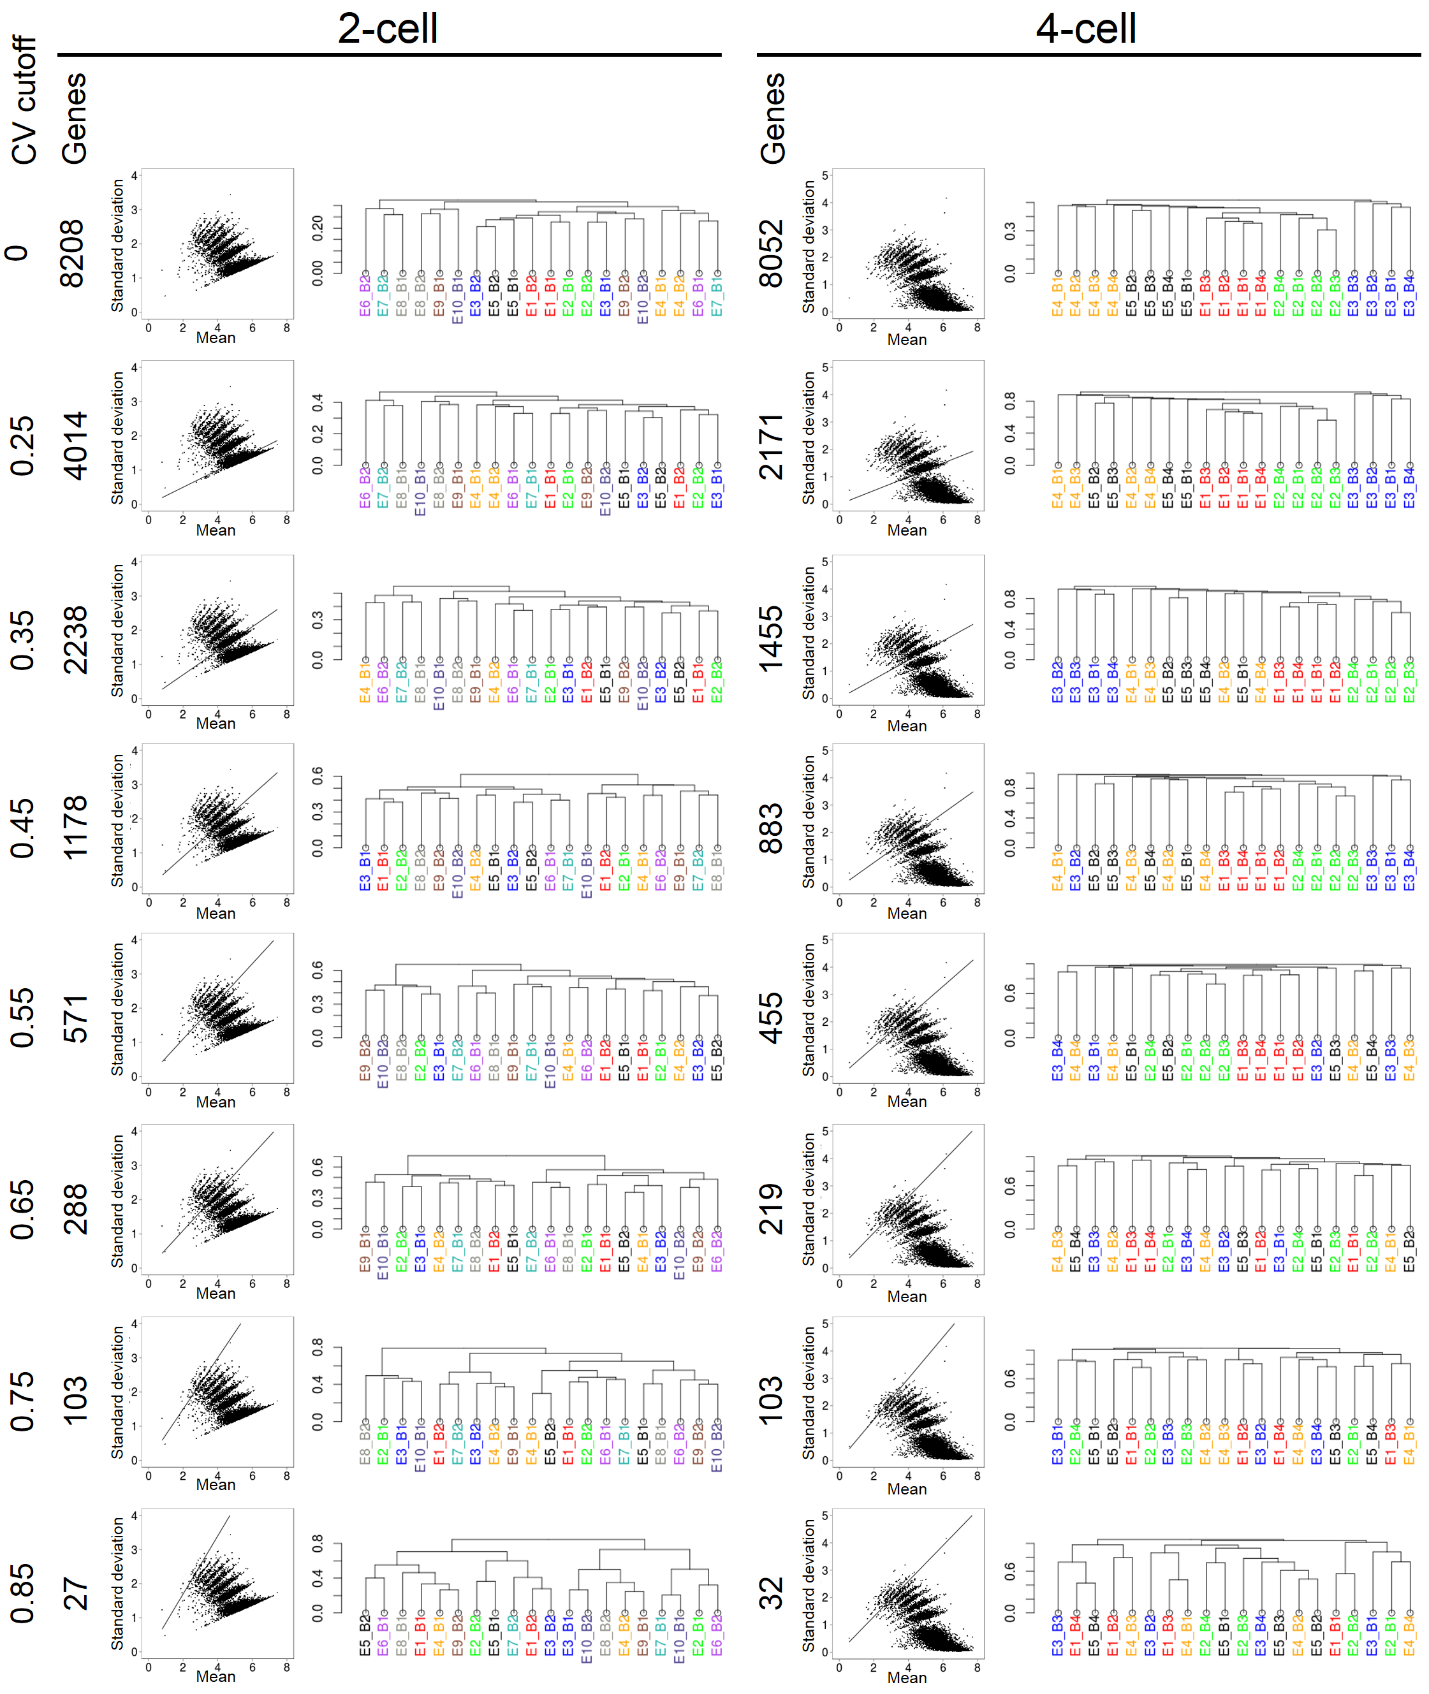


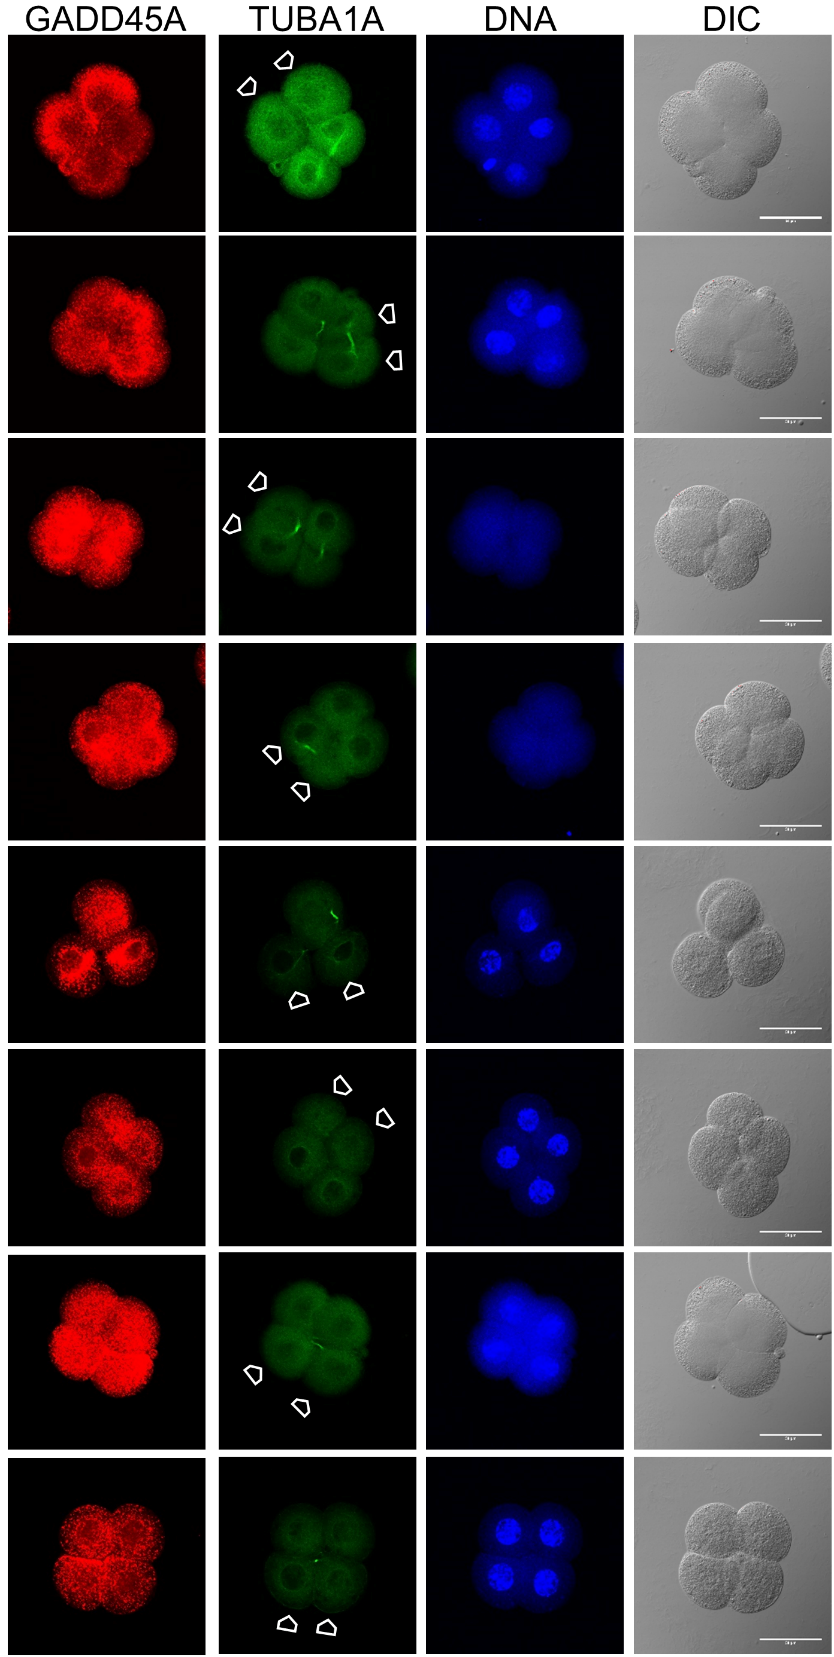
Figure S4. GADD45A protein expression in eight 4-cell mouse embryos. For each embryo (row), the confocal images were captured from the same z stack from an immunocytochemistry assay of GADD45A (alexa-548, red) and alpha-tubulin (TUBA1A, alexa-488, green). Arrowheads point to the blastomeres that were derived from same mother cell. The focal planes were chosen to allow the visualization of the center of the embryo, in addition to the remainder structure of spindle apparatuses. DNA: DAPI fluorescence. DIC: Differential interference contrast image. Scale bar: 50μm.

6

8

1

7

3

2

5

4

Figure S5. Coverage plots of single-cell RNA-seq reads. Each row represents a cell. The gene models are at the bottom of the plots. (A) *Zfp688*, a candidate bimodality gene due to ZGA. (B) *Rsph3a*, a candidate bimodality gene due to blastomere-specific RNA depletion.


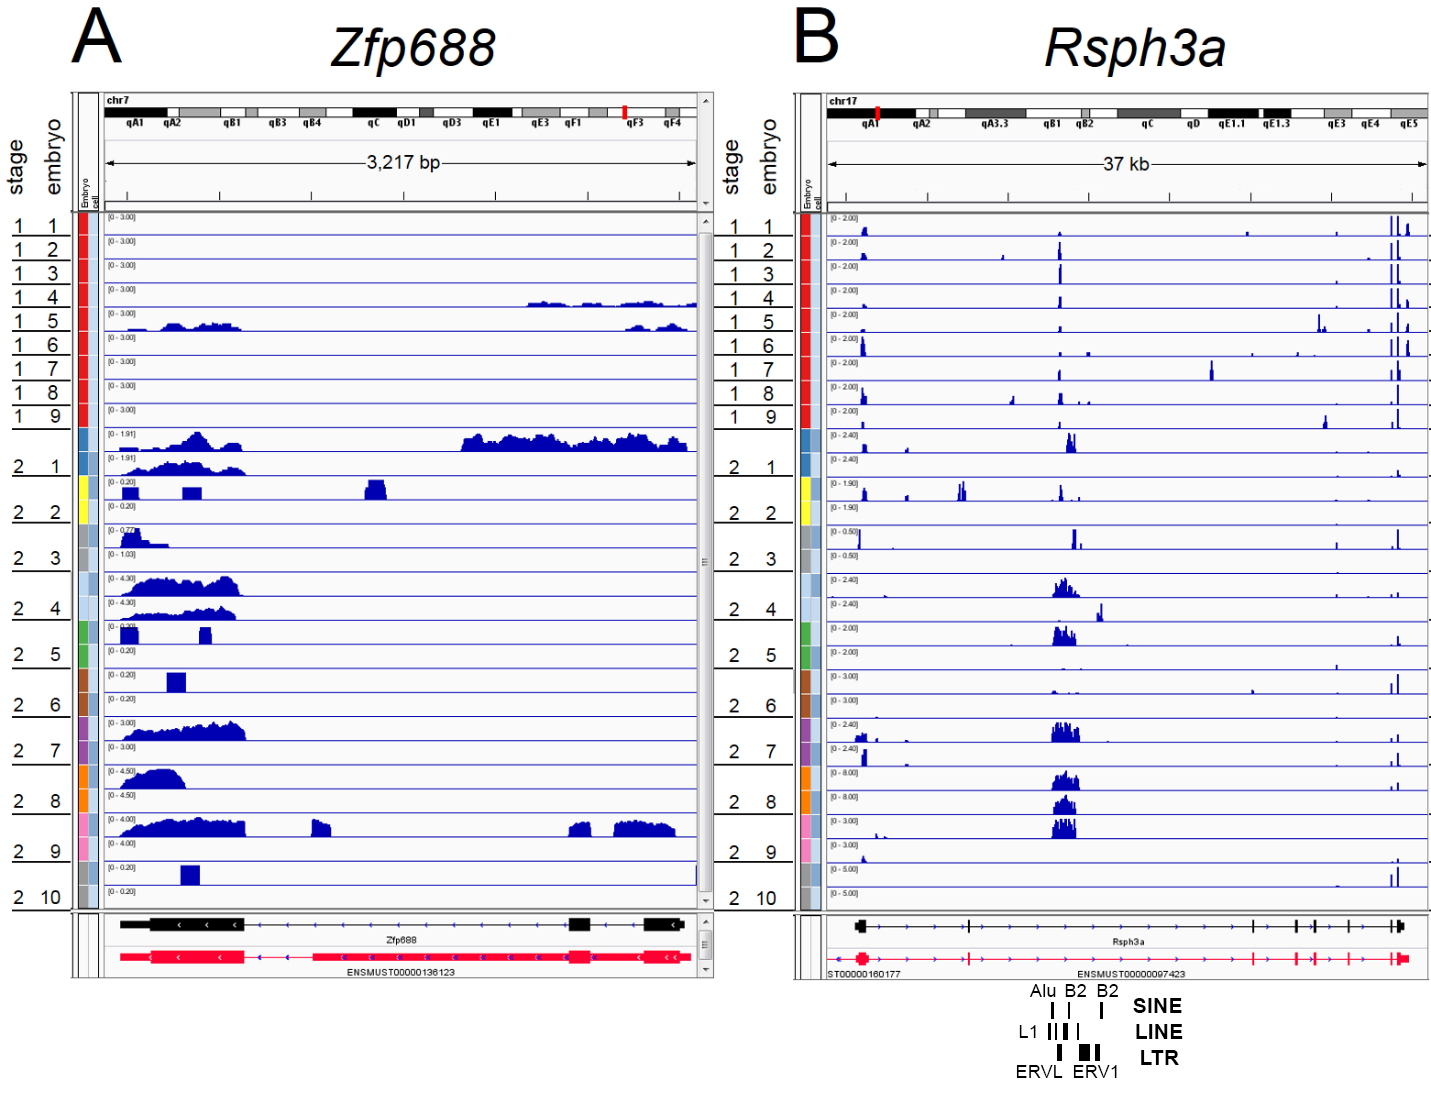


Figure S6. Bootstrap analysis of co-expression networks. After removing between-embryo variations, we generated 385 bootstrap datasets by resampling 6, 7, 8 or 9 embryos from the 2-cell embryos (A), and 15 datasets by resampling 3 or 4 embryos from the 4-cell embryos (B). The gene pairs within the top 10% highest correlations in 80% or more bootstrap datasets were retained, and then intersected with BioGRID documented protein-protein or regulatory interactions[4](#_ENREF_4). These intersected interactions are denoted as an edge, besides which is the number of times that this pair ranked in the top 10% by correlation in the bootstrap datasets.


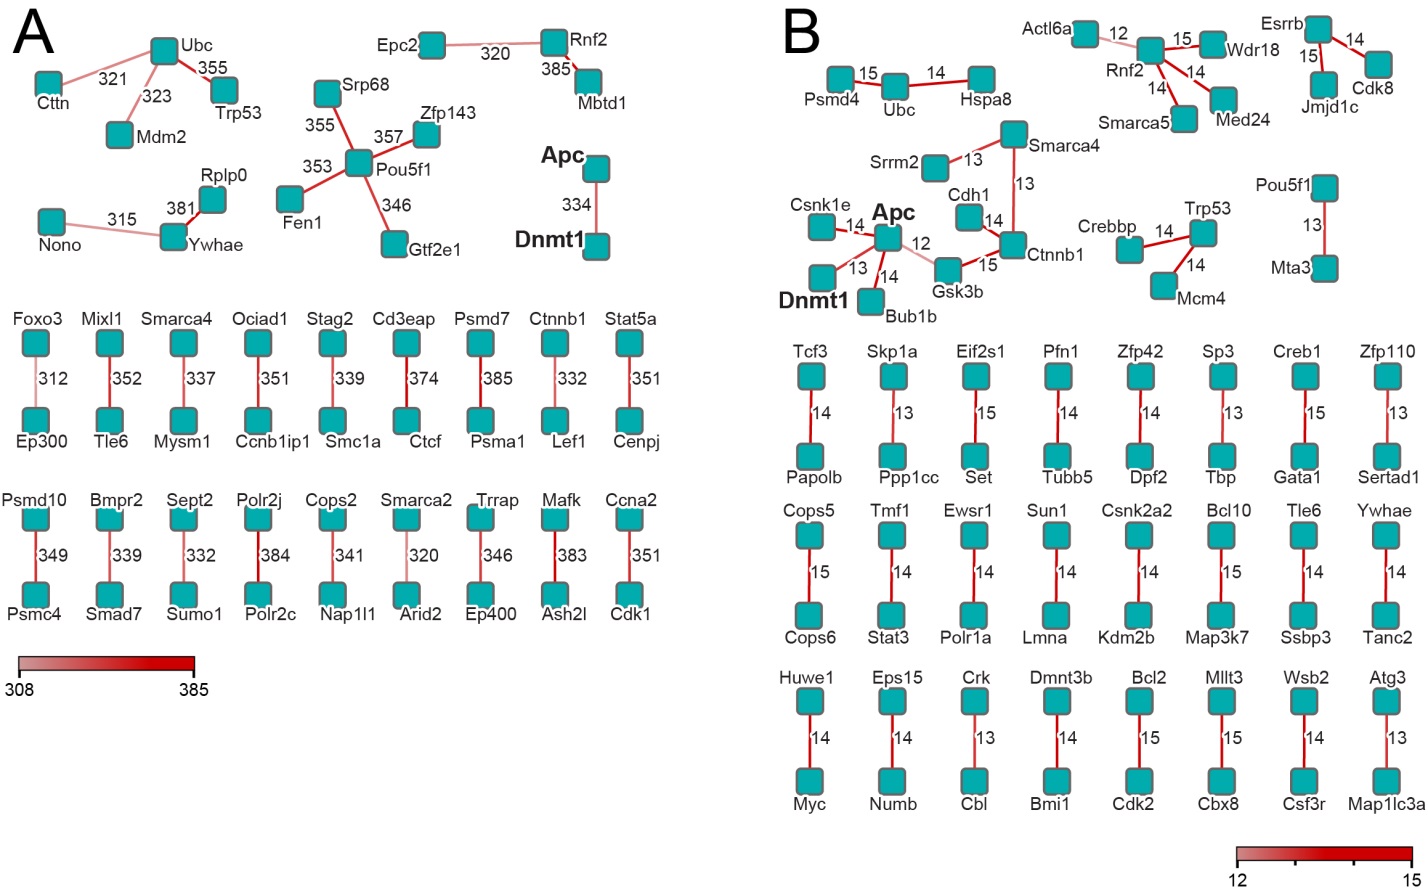


Figure S7. The genes with large total cell-to-cell variations are enriched with the genes showing bimodal expression patterns within each embryo. All detected genes are plotted with their standard deviations (y-axis) and mean expression levels (x-axis). The genes that exhibited within-embryo bimodal expression patterns are plotted in red (FDR < 0.05), black (0.05 ≤ FDR < 0.1), and dark blue (0.1 ≤ FDR < 0.3).


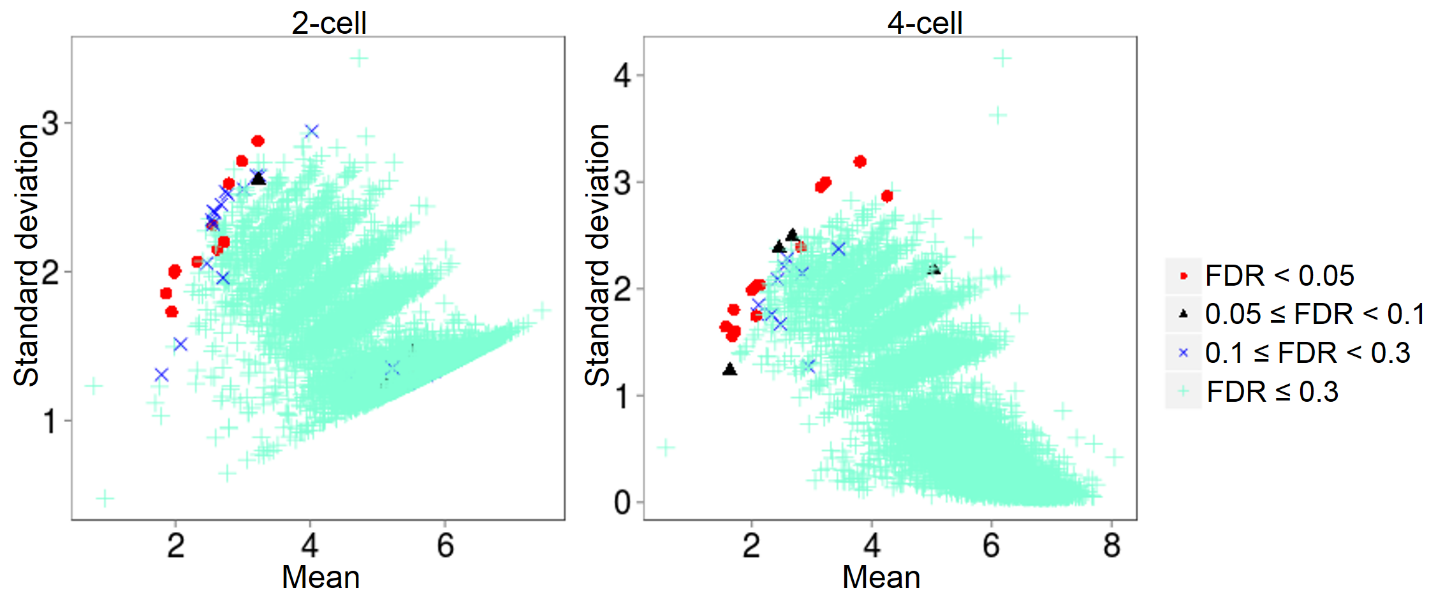


Figure S8. Quantitative real time PCR of 96 genes during fist two cleavages of mouse embryo development. (A) Expression data of 96 genes in zygotes, 2- and 4-cell mouse embryos. (B) Average gene expression (log2 space) estimated by RNA-seq and qPCR (error bars: standard error, 2-cell N=90 genes, 4-cell N=78 genes). (C) Coefficient of variation estimated from data collected by RNA-seq and qPCR methods.


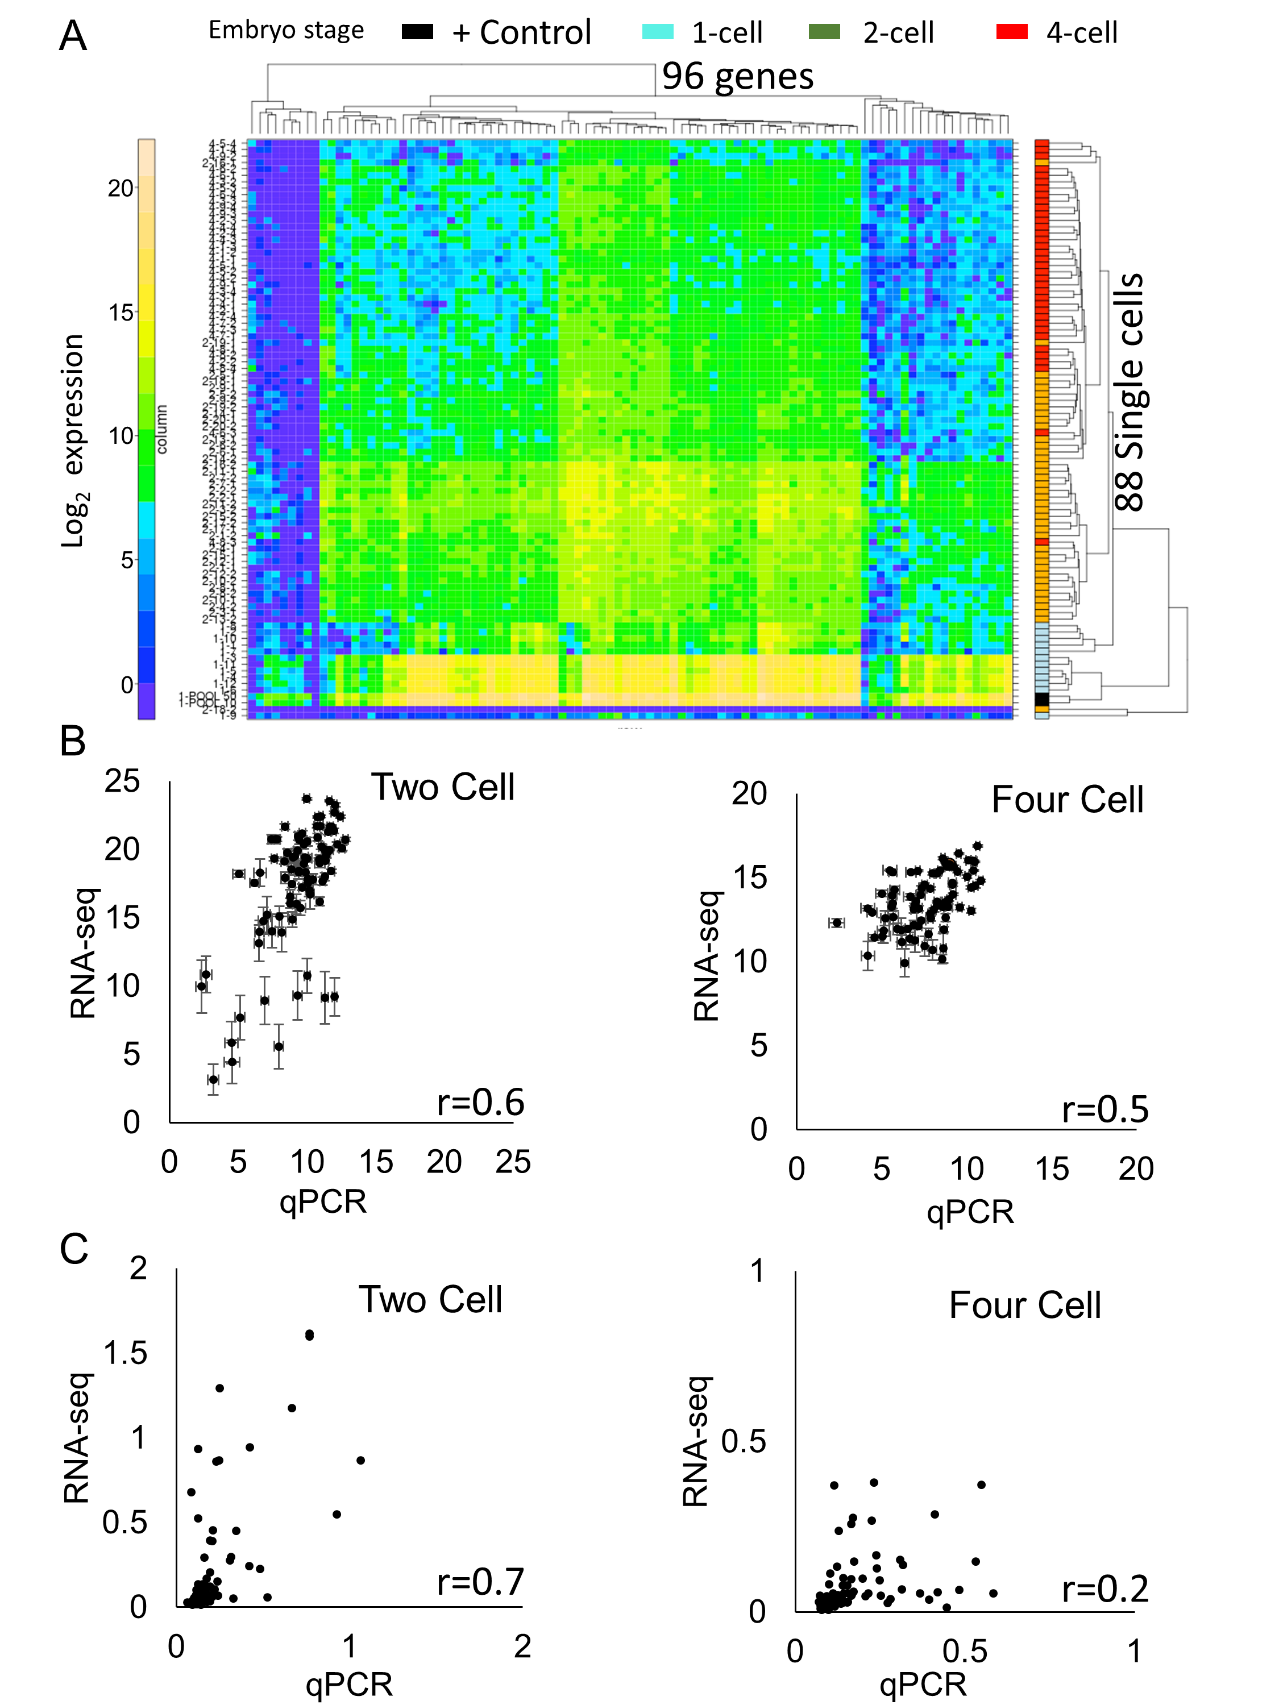


Table S1. Results of Dip test of deviation of unimodal distribution for inter-blastomere gene expression at 2-cell stage (FDR < 0.30).

| Gene ID | Symbol | Dip statistic | p value | FDR |
| --- | --- | --- | --- | --- |
| ENSMUSG00000001419 | *Mef2d* | 0.1754 | 0.0000 | 0.0000 |
| ENSMUSG00000008036 | *Ap2s1* | 0.1656 | 0.0000 | 0.0000 |
| ENSMUSG00000026697 | *Myoc* | 0.1814 | 0.0000 | 0.0000 |
| ENSMUSG00000027180 | *Fbxo3* | 0.1699 | 0.0000 | 0.0000 |
| ENSMUSG00000028274 | *Rngtt* | 0.1506 | 0.0000 | 0.0000 |
| ENSMUSG00000036019 | *Tmtc2* | 0.1648 | 0.0000 | 0.0000 |
| ENSMUSG00000036155 | *Mgat5* | 0.1825 | 0.0000 | 0.0000 |
| ENSMUSG00000045251 | *Zfp688* | 0.1522 | 0.0000 | 0.0000 |
| ENSMUSG00000048398 | *Gm5065* | 0.1487 | 0.0000 | 0.0000 |
| ENSMUSG00000050288 | *Fzd2* | 0.1731 | 0.0000 | 0.0000 |
| ENSMUSG00000059179 | *Gm8991* | 0.1807 | 0.0000 | 0.0000 |
| ENSMUSG00000061479 | *Snrpa* | 0.1641 | 0.0000 | 0.0000 |
| ENSMUSG00000071180 | *Smim15* | 0.1454 | 0.0000 | 0.0000 |
| ENSMUSG00000073471 | *Rsph3a* | 0.1526 | 0.0000 | 0.0000 |
| ENSMUSG00000040325 | *Vprbp* | 0.1536 | 0.0002 | 0.0821 |
| ENSMUSG00000041438 | *Cirh1a* | 0.1547 | 0.0002 | 0.0821 |
| ENSMUSG00000044934 | *Zfp367* | 0.1507 | 0.0002 | 0.0821 |
| ENSMUSG00000052819 | *Best2* | 0.1428 | 0.0002 | 0.0821 |
| ENSMUSG00000063450 | *Syne2* | 0.1443 | 0.0002 | 0.0821 |
| ENSMUSG00000070576 | *Mn1* | 0.1511 | 0.0002 | 0.0821 |
| ENSMUSG00000011960 | *Ccnt1* | 0.1413 | 0.0004 | 0.1263 |
| ENSMUSG00000043923 | *Ccdc84* | 0.1490 | 0.0004 | 0.1263 |
| ENSMUSG00000053137 | *Mapk11* | 0.1413 | 0.0004 | 0.1263 |
| ENSMUSG00000053644 | *Aldh7a1* | 0.1488 | 0.0004 | 0.1263 |
| ENSMUSG00000070407 | *Hs3st3b1* | 0.1426 | 0.0004 | 0.1263 |
| ENSMUSG00000090451 | *Gm6133* | 0.1465 | 0.0004 | 0.1263 |
| ENSMUSG00000007815 | *Rhoa* | 0.1375 | 0.0006 | 0.1642 |
| ENSMUSG00000017778 | *Cox7c* | 0.1385 | 0.0006 | 0.1642 |
| ENSMUSG00000031661 | *Nkd1* | 0.1487 | 0.0006 | 0.1642 |
| ENSMUSG00000038612 | *Mcl1* | 0.1439 | 0.0006 | 0.1642 |
| ENSMUSG00000016758 | *Bik* | 0.1414 | 0.0008 | 0.1990 |
| ENSMUSG00000030934 | *Oat* | 0.1361 | 0.0008 | 0.1990 |
| ENSMUSG00000036223 | *Ska1* | 0.1439 | 0.0008 | 0.1990 |
| ENSMUSG00000003352 | *Cacnb3* | 0.1361 | 0.0010 | 0.2052 |
| ENSMUSG00000021068 | *Nin* | 0.1424 | 0.0010 | 0.2052 |
| ENSMUSG00000024238 | *Zeb1* | 0.1435 | 0.0010 | 0.2052 |
| ENSMUSG00000038535 | *Zfp280d* | 0.1334 | 0.0010 | 0.2052 |
| ENSMUSG00000041287 | *Sox15* | 0.1362 | 0.0010 | 0.2052 |
| ENSMUSG00000078813 | *Leng1* | 0.1349 | 0.0010 | 0.2052 |
| ENSMUSG00000092592 | *Gm20449* | 0.1358 | 0.0010 | 0.2052 |
| ENSMUSG00000021606 | *Ndufs6* | 0.1350 | 0.0012 | 0.2345 |
| ENSMUSG00000050106 | *Tmc8* | 0.1428 | 0.0012 | 0.2345 |
| ENSMUSG00000041153 | *Osgin2* | 0.1345 | 0.0014 | 0.2672 |
| ENSMUSG00000027160 | *Ccdc34* | 0.1329 | 0.0016 | 0.2855 |
| ENSMUSG00000033545 | *Znrf1* | 0.1308 | 0.0016 | 0.2855 |
| ENSMUSG00000045776 | *Lrtm1* | 0.1326 | 0.0016 | 0.2855 |

Table S2. Results of Dip test of deviation of unimodal distribution for inter-blastomere gene expression at 4-cell stage (FDR < 0.30).

| Gene ID | Symbol | Dip statistic | p value | FDR |
| --- | --- | --- | --- | --- |
| ENSMUSG00000018479 | *1700125H20Rik* | 0.1833 | 0.0000 | 0.0000 |
| ENSMUSG00000029094 | *Afap1* | 0.1788 | 0.0000 | 0.0000 |
| ENSMUSG00000029098 | *Acox3* | 0.1480 | 0.0000 | 0.0000 |
| ENSMUSG00000031486 | *Gpr124* | 0.1579 | 0.0000 | 0.0000 |
| ENSMUSG00000034656 | *Cacna1a* | 0.1882 | 0.0000 | 0.0000 |
| ENSMUSG00000036390 | *Gadd45a* | 0.1432 | 0.0000 | 0.0000 |
| ENSMUSG00000039145 | *Camk1d* | 0.1497 | 0.0000 | 0.0000 |
| ENSMUSG00000049571 | *9330101J02Rik* | 0.1774 | 0.0000 | 0.0000 |
| ENSMUSG00000059877 | *Dph3b-ps* | 0.1795 | 0.0000 | 0.0000 |
| ENSMUSG00000071714 | *Csf2rb2* | 0.1808 | 0.0000 | 0.0000 |
| ENSMUSG00000073371 | *Gm6594* | 0.1487 | 0.0000 | 0.0000 |
| ENSMUSG00000092592 | *Gm20449* | 0.1872 | 0.0000 | 0.0000 |
| ENSMUSG00000096887 | *Gm20594* | 0.1827 | 0.0000 | 0.0000 |
| ENSMUSG00000019320 | *Noxo1* | 0.1471 | 0.0002 | 0.0947 |
| ENSMUSG00000022262 | *Dnahc5* | 0.1429 | 0.0002 | 0.0947 |
| ENSMUSG00000040189 | *Ccdc114* | 0.1464 | 0.0002 | 0.0947 |
| ENSMUSG00000069620 | *Gm5250* | 0.1442 | 0.0002 | 0.0947 |
| ENSMUSG00000001870 | *Ltbp1* | 0.1361 | 0.0004 | 0.1610 |
| ENSMUSG00000034109 | *Golim4* | 0.1417 | 0.0004 | 0.1610 |
| ENSMUSG00000040447 | *Spns2* | 0.1400 | 0.0004 | 0.1610 |
| ENSMUSG00000028524 | *Sgip1* | 0.1408 | 0.0006 | 0.2196 |
| ENSMUSG00000038593 | *Tctn1* | 0.1418 | 0.0006 | 0.2196 |
| ENSMUSG00000036155 | *Mgat5* | 0.1466 | 0.0008 | 0.2478 |
| ENSMUSG00000042607 | *Asb4* | 0.1408 | 0.0008 | 0.2478 |
| ENSMUSG00000070304 | *Scn2b* | 0.1396 | 0.0008 | 0.2478 |
| ENSMUSG00000091028 | *Gm10722* | 0.1407 | 0.0008 | 0.2478 |
| ENSMUSG00000046605 | *B3gntl1* | 0.1432 | 0.0010 | 0.2982 |

Table S3. Quantification of fluorescence intensity, statistical analysis and visual assessment of GADD45A expression in mouse embryos at 4-cell stage.

| Embryo | GADD45Aa | | | |  | T test p value | |  | Visual contrast | |
| --- | --- | --- | --- | --- | --- | --- | --- | --- | --- | --- |
|  | cell 1 | cell 2 | cell 3 | cell 4 |  | Intensityb  defined | Mitosisc  defined |  | Intensityb  defined | Mitosisc  defined |
| 1 | 2523.3 | 2859.0 | 1903.8 | 1947.7 |  | 0.0228 | 0.0228 |  | yes | yes |
| 2 | 2693.2 | 2709.4 | 2380.8 | 2152.7 |  | 0.0314 | 0.0314 |  | yes | yes |
| 3 | 3092.3 | 2950.8 | 2575.4 | 2214.9 |  | 0.0419 | 0.0419 |  | yes | yes |
| 4 | 2503.4 | 2335.9 | 2715.7 | 2560.4 |  | 0.0980 | 0.0980 |  | yes | yes |
| 5 | 1978.9 | 1930.1 | 2070.8 | 2070.8 |  | 0.0206 | 0.0206 |  | yes | yes |
| 6 | 1907.1 | 1142.3 | 1915.9 | 1337.4 |  | 0.0102 | 0.4257 |  | yes | yes |
| 7 | 3350.2 | 2543.5 | 2890.3 | 2554.3 |  | 0.0655 | 0.3292 |  | yes | possibly |
| 8 | 2271.0 | 1896.3 | 2510.4 | 2034.8 |  | 0.0457 | 0.2982 |  | yes | possibly |

a AFU: arbitrary units of fluorescence. Cell 1 and 2 are descendent from the same mother cell; b two cells with greater AFU were compared with two cells with lower AFU; c pairs of cells with different mitotic descendancy (defined by the spindle apparatus) were compared.

Table S4. Gene ontology (GO) biological functions of genes potentially associated to the cell fate and decision making process at 4-cel stage.

| Gene ID | Symbol | GO ID | GO term |
| --- | --- | --- | --- |
| ENSMUSG00000021650 | *Ptcd2* | GO:0048468 | cell development |
| ENSMUSG00000021461 | *Fancc* | GO:0048468 | cell development |
| ENSMUSG00000030447 | *Cyfip1* | GO:0048468 | cell development |
| ENSMUSG00000024563 | *Smad2* | GO:0030154 | cell differentiation |
| ENSMUSG00000021650 | *Ptcd2* | GO:0030154 | cell differentiation |
| ENSMUSG00000069565 | *Dazap1* | GO:0030154 | cell differentiation |
| ENSMUSG00000021461 | *Fancc* | GO:0030154 | cell differentiation |
| ENSMUSG00000065954 | *Tacc1* | GO:0030154 | cell differentiation |
| ENSMUSG00000006024 | *Napa* | GO:0030154 | cell differentiation |
| ENSMUSG00000015522 | *Arnt* | GO:0030154 | cell differentiation |
| ENSMUSG00000030447 | *Cyfip1* | GO:0030154 | cell differentiation |
| ENSMUSG00000024563 | *Smad2* | GO:0007166 | cell surface receptor linked signal transduction |
| ENSMUSG00000025357 | *Dgka* | GO:0007166 | cell surface receptor linked signal transduction |
| ENSMUSG00000039166 | *Akap7* | GO:0007166 | cell surface receptor linked signal transduction |
| ENSMUSG00000024563 | *Smad2* | GO:0048869 | cellular developmental process |
| ENSMUSG00000021650 | *Ptcd2* | GO:0048869 | cellular developmental process |
| ENSMUSG00000069565 | *Dazap1* | GO:0048869 | cellular developmental process |
| ENSMUSG00000021461 | *Fancc* | GO:0048869 | cellular developmental process |
| ENSMUSG00000065954 | *Tacc1* | GO:0048869 | cellular developmental process |
| ENSMUSG00000006024 | *Napa* | GO:0048869 | cellular developmental process |
| ENSMUSG00000015522 | *Arnt* | GO:0048869 | cellular developmental process |
| ENSMUSG00000030447 | *Cyfip1* | GO:0048869 | cellular developmental process |
| ENSMUSG00000024563 | *Smad2* | GO:0048589 | developmental growth |
| ENSMUSG00000030447 | *Cyfip1* | GO:0048589 | developmental growth |
| ENSMUSG00000024563 | *Smad2* | GO:0032502 | developmental process |
| ENSMUSG00000021650 | *Ptcd2* | GO:0032502 | developmental process |
| ENSMUSG00000057531 | *Dtnbp1* | GO:0032502 | developmental process |
| ENSMUSG00000033501 | *Crygs* | GO:0032502 | developmental process |
| ENSMUSG00000069565 | *Dazap1* | GO:0032502 | developmental process |
| ENSMUSG00000021461 | *Fancc* | GO:0032502 | developmental process |
| ENSMUSG00000036427 | *Gpi1* | GO:0032502 | developmental process |
| ENSMUSG00000065954 | *Tacc1* | GO:0032502 | developmental process |
| ENSMUSG00000079259 | *Trim71* | GO:0032502 | developmental process |
| ENSMUSG00000022556 | *Hsf1* | GO:0032502 | developmental process |
| ENSMUSG00000006024 | *Napa* | GO:0032502 | developmental process |
| ENSMUSG00000015522 | *Arnt* | GO:0032502 | developmental process |
| ENSMUSG00000026192 | *Atic* | GO:0032502 | developmental process |
| ENSMUSG00000030447 | *Cyfip1* | GO:0032502 | developmental process |
| ENSMUSG00000038000 | *Acd* | GO:0032502 | developmental process |
| ENSMUSG00000024563 | *Smad2* | GO:0009790 | embryonic development |
| ENSMUSG00000022556 | *Hsf1* | GO:0009790 | embryonic development |
| ENSMUSG00000015522 | *Arnt* | GO:0009790 | embryonic development |
| ENSMUSG00000038000 | *Acd* | GO:0009790 | embryonic development |
| ENSMUSG00000072872 | *Rybp* | GO:0010468 | regulation of gene expression |
| ENSMUSG00000024563 | *Smad2* | GO:0010468 | regulation of gene expression |
| ENSMUSG00000021650 | *Ptcd2* | GO:0010468 | regulation of gene expression |
| ENSMUSG00000038116 | *Phf20* | GO:0010468 | regulation of gene expression |
| ENSMUSG00000029814 | *Igf2bp3* | GO:0010468 | regulation of gene expression |
| ENSMUSG00000055228 | *Zfp935* | GO:0010468 | regulation of gene expression |
| ENSMUSG00000079215 | *Zfp664* | GO:0010468 | regulation of gene expression |
| ENSMUSG00000022556 | *Hsf1* | GO:0010468 | regulation of gene expression |
| ENSMUSG00000003662 | *Ciao1* | GO:0010468 | regulation of gene expression |
| ENSMUSG00000008958 | *Vps72* | GO:0010468 | regulation of gene expression |
| ENSMUSG00000015522 | *Arnt* | GO:0010468 | regulation of gene expression |
| ENSMUSG00000021258 | *Ccnk* | GO:0010468 | regulation of gene expression |
| ENSMUSG00000024563 | *Smad2* | GO:0048731 | system development |
| ENSMUSG00000021650 | *Ptcd2* | GO:0048731 | system development |
| ENSMUSG00000057531 | *Dtnbp1* | GO:0048731 | system development |
| ENSMUSG00000033501 | *Crygs* | GO:0048731 | system development |
| ENSMUSG00000036427 | *Gpi1* | GO:0048731 | system development |
| ENSMUSG00000065954 | *Tacc1* | GO:0048731 | system development |
| ENSMUSG00000022556 | *Hsf1* | GO:0048731 | system development |
| ENSMUSG00000006024 | *Napa* | GO:0048731 | system development |
| ENSMUSG00000015522 | *Arnt* | GO:0048731 | system development |
| ENSMUSG00000026192 | *Atic* | GO:0048731 | system development |
| ENSMUSG00000030447 | *Cyfip1* | GO:0048731 | system development |
| ENSMUSG00000038000 | *Acd* | GO:0048731 | system development |

Table S5. Within-embryo bimodal genes at the 2-cell stage, corresponding to Figure 3A.

|  |  | Signaling | | Regulator of | | | | |
| --- | --- | --- | --- | --- | --- | --- | --- | --- |
| Gene | Behavior | Pathways | Function | Transcription | Epigenetics | mRNA | Protein | Cell |
| *Fzd2* | SSwe >> SSbe  Bimodal | WNT | Receptor |  |  |  |  |  |
| *Mgat5* | SSwe >> SSbe  Bimodal | WNT | Ligand biogenesis;  Direct target[23](#_ENREF_23) |  |  |  |  | Adhesion, migration |
| *Zeb1* | SSwe >> SSbe | WNT | Direct target[22](#_ENREF_22) | TF |  |  |  |  |
| *Myoc* | Bimodal  corr w. *Ap2s1* | WNT | Receptor-binding[16](#_ENREF_16) |  |  |  |  |  |
| *Ap2s1* | Bimodal corr w. *Myoc* | WNT | Endocytosis of WNT[1](#_ENREF_1); Asso w. MYOC; WNT inducible[11](#_ENREF_11). |  |  |  |  |  |
| *Fbxo3* | Bimodal |  |  | TF activation | P300 ubiquitination |  | Degradation |  |
| *Tmtc2* | Bimodal |  |  |  |  |  | Binding |  |
| *Mef2d* | Bimodal | Multiple | TF | TF | HDAC binding |  |  |  |
| *Zfp688* | Bimodal |  |  | TF |  |  |  |  |
| *Rngtt* | Bimodal |  |  |  |  | 5’ capping | Phosphatase |  |
| *Rsph3a* | Bimodal | WNT, TGF-β, Hippo | SMAD3 binding[8](#_ENREF_8), [13](#_ENREF_13) |  |  |  |  |  |

Table S6. Within-embryo bimodal genes at the 4-cell stage, corresponding to Figure 3B.

|  |  | Signaling | | Regulator of | | | | |
| --- | --- | --- | --- | --- | --- | --- | --- | --- |
| Gene | Behavior | Pathways | Function | Transcription | Epigenetics | mRNA | Protein / fatty acids | Cell |
| *Acox3* | Bimodal;  Corr w. *Camk1d* | Multiple | SMAD binding[5](#_ENREF_5) |  |  |  | acyl-CoA dehydrogenase |  |
| *Afap1* | Bimodal |  | Conversion of mechanical force into signaling [9](#_ENREF_9) |  |  |  | SRC and aPKC binding * | Modulator of actin  filament |
| *Cacna1a* | Bimodal | MAPK, Calcium | Ca2+ channel |  |  |  |  |  |
| *Camk1d* | Bimodal;  Corr w. *Acox3* | EGFR | Ca2+ dependent kinase | TF activation |  |  | Kinase |  |
| *Csf2rb2* | Bimodal;  Corr w. *Gpr124* |  | Receptor |  |  |  |  |  |
| *Gadd45a* | Bimodal | MAPK |  | P53 inducible, promoter binding |  |  |  |  |
| *Gpr124* | Bimodal | GPCR | Receptor |  |  |  |  |  |
| *Dph3b-ps* | Bimodal |  |  |  |  |  |  |  |
| Unannotated genes | | | | | | | | |
| *1700124H20Rik* | Bimodal |  |  |  |  |  |  |  |
| *9330101J02Rik* | Bimodal |  |  |  |  |  |  |  |
| *Gm20449* | Bimodal |  |  |  |  |  |  |  |
| *Gm20594* | Bimodal |  |  |  |  |  |  |  |
| *Gm6594* | Bimodal |  |  |  |  |  |  |  |

* Afap1 interacts with atypical Protein kinase Cs (aPKC), including PKC-zeta and PKC-gamma [20](#_ENREF_20" \o "Qian, 2002 #82). aPKCs are involved in cell polarity and influence cell fate in PED [19](#_ENREF_19).

Table S7. Gene pairs exhibiting large correlations at both 2-cell and 4-cell cell stages, corresponding to Figure 5C. Between-embryo variations were removed before calculation of correlations.

|  |  | Signaling | | Regulator of | | | | |
| --- | --- | --- | --- | --- | --- | --- | --- | --- |
| Gene | Corr with | Pathway | Function | Transcription | Epigenetics | mRNA | Protein | Cell |
| *Tcf3* | *Bhmt2* | WNT | Core TF | TF |  |  |  |  |
| *Bhmt2* | *Tcf3* |  |  |  | Methyl transferase |  | Methyl transferase |  |
| *Tbx3* | *Tnfrsf12a* | WNT | a.k.a. *Brachury*, induces Wnt8 and Wnt3a[*22*](#_ENREF_22) | TF |  |  |  |  |
| *Tnfrsf12a* | *Tbx3* | TNF | Receptor |  |  |  |  |  |
| *P53* | *Zfp951* | Multiple |  | TF |  |  |  |  |
| *Zfp951* | *P53* |  |  | TF |  |  |  |  |
| *Frs2* | *Ramp2, Tchp* | FGF | Receptor |  |  |  |  |  |
| *Ramp2* | *Frs2* | GPCR | Modifier |  |  |  |  |  |
| *Tchp* | *Frs2* |  |  |  |  |  |  | Cytoskeleton remodeler |
| *Bbs4* | *Nxt2* |  |  |  |  |  | Transport to centrosome | Polarity[21](#_ENREF_21) |
| *Nxt2* | *Bbs4* |  |  |  |  | Transport; Surveillance | Transport |  |
| *Pdlim7* | *Scamp4* | EGFR |  |  |  |  | PKC binding | Focal adhesion |
| *Scamp4* | *Pdlim7* |  |  |  |  |  | Transport |  |
| *Aspm* | *Parp12* | EGFR | Key target[10](#_ENREF_10) |  |  |  |  | Centrosome positioning, asymmetric division[11](#_ENREF_11), [13](#_ENREF_13), [18](#_ENREF_18) |
| *Parp12* | *Aspm* |  |  |  | HDAC, SUMO1 interaction |  | Post-translational modification |  |
| *Lgr4* | *Fbl* | WNT | Receptor binding [7](#_ENREF_7);  WNT agonist receptor [6](#_ENREF_6) |  |  |  |  |  |
| *Fbl* | *Lgr4* |  |  |  |  | snRNP, processing |  |  |
| *Cdk1* | *Polr2f* |  |  |  |  |  | Kinase | Cell cycle |
| *Polr2f* | *Cdk1* |  |  | RNA pol II |  |  |  |  |
| *Uchl3* | *Uchl4* |  |  |  |  |  | Protease;  Deubiquitina-tion | Apical membrane recycling[2](#_ENREF_2) |
| *Uchl4* | *Uchl3* |  |  |  |  |  | Proteolysis |  |
| *Apc* | *Dnmt1* | WNT, Hippo | β-catenin binding |  |  |  |  | Germ-cell asymmetric division[24](#_ENREF_24) |
| *Dnmt1* | *Apc* |  |  |  | DNA methylation |  |  |  |

Table S8. Cell-polarity associated mRNAs implicated by bimodality or correlation, elaborating Tables S5-S7.

| Gene | From | Function |
| --- | --- | --- |
| *Actin filament associated protein 1* (*Afap1*) | Table S6 | Interacts with atypical Protein kinase Cs (aPKC), including PKC-zeta and PKC-gamma[20](#_ENREF_20). aPKCs are polarized in 8-cell blastomeres and regulate asymmetric division[19](#_ENREF_19). Knock-down of aPKCs in a 4-cell stage blastomere directs its progeny to the ICM[19](#_ENREF_19). |
| *Bardet-Biedl syndrome* *4* (*Bbs4*) | Table S7 | Regulates planar cell polarity[21](#_ENREF_21) likely by loading cargo onto a molecular motor for intracellular transportation[12](#_ENREF_12). |
| *Abnormal spindle homolog* *(Aspm)* | Table S7 | Encodes a spindle pole/centrosome protein essential for neurogenic mitosis and possibly controlling the fate-switch to asymmetric cell division[14](#_ENREF_14), [18](#_ENREF_18), [26](#_ENREF_26). |
| *Adenomatous polyposis coli* (*Apc*) | Table S7 | Regulates asymmetric division in germ-line stem cells[24](#_ENREF_24). Its correlated gene *Dnmt1* is a transcriptional target of the APC pathway[3](#_ENREF_3). |
| *Ubiquitin carboxyl-terminal esterase L3* (*Uchl3*) and *Uchl4* | Table S7 | Mammalian homologs of the yeast deubiquitinating enzymes (DUBs), which are essential for controlling cell polarity[15](#_ENREF_15). In mammals, UCHL3 concentrates at the apical side of polarized epithelial cells[2](#_ENREF_2), heads of sperms[25](#_ENREF_25) and is important for normal PED[17](#_ENREF_17). |

Table S9. Genes* selected for transcript quantification by qPCR in zygotes, 2- and 4-cell mouse embryos.

| RefSeq | Symbol | Gene |
| --- | --- | --- |
| NM_007393 | *Actb* | actin, beta |
| NM_009677 | *Ap1g1* | adaptor protein complex AP-1, gamma 1 subunit |
| NM_009679 | *Ap2m1* | predicted gene 8717; adaptor protein complex AP-2, mu1 |
| NM_007497 | *Atf1* | predicted gene 1862; activating transcription factor 1; similar to activating transcription factor 1 |
| NM_019426 | *Atf7ip* | activating transcription factor 7 interacting protein |
| NM_011497 | *Aurka* | aurora kinase A |
| NM_054078 | *Baz2a* | bromodomain adjacent to zinc finger domain, 2A |
| NM_001012273 | *Birc5* | baculoviral IAP repeat-containing 5 |
| NM_009764 | *Brca1* | breast cancer 1 |
| NM_009794 | *Capn2* | calpain 2 |
| NM_021531 | *Carm1* | coactivator-associated arginine methyltransferase 1 |
| NM_009832 | *Ccnk* | cyclin K; similar to cyclin K |
| NM_009864 | *Cdh1* | cadherin 1 |
| NM_153599 | *Cdk8* | predicted gene 7107; cyclin-dependent kinase 8 |
| NM_007673 | *Cdx2* | caudal type homeo box 2 |
| NM_133840 | *Clp1* | CLP1, cleavage and polyadenylation factor I subunit, homolog (S. cerevisiae) |
| NM_181322 | *Ctcf* | CCCTC-binding factor |
| NM_009818 | *Ctnna1* | catenin (cadherin associated protein), alpha 1 |
| NM_017397 | *Ddx20* | DEAD (Asp-Glu-Ala-Asp) box polypeptide 20 |
| NM_148948 | *Dicer1* | Dicer1, Dcr-1 homolog (Drosophila) |
| NM_023178 | *Dmap1* | DNA methyltransferase 1-associated protein 1 |
| NM_010066 | *Dnmt1* | DNA methyltransferase (cytosine-5) 1 |
| NM_007872 | *Dnmt3a* | DNA methyltransferase 3A |
| NM_001003961 | *Dnmr3b* | DNA methyltransferase 3B |
| NM_021876 | *Eed* | embryonic ectoderm development |
| NM_153178 | *Euf2c2* | eukaryotic translation initiation factor 2C, 2 |
| NM_010136 | *Eomes* | eomesodermin homolog (Xenopus laevis) |
| NM_027497 | *Epc1* | enhancer of polycomb homolog 1 (Drosophila) |
| NM_007949 | *Ercc2* | excision repair cross-complementing rodent repair deficiency, complementation group 2 |
| NM_007966 | *Evx1* | even skipped homeotic gene 1 homolog |
| NM_007991 | *Fbl* | similar to Fibrillarin; fibrillarin |
| NM_025995 | *Fbxo5* | F-box protein 5 |
| NM_008084 | *Gapdh* | glyceraldehyde-3-phosphate dehydrogenase |
| NM_008092 | *Gata4* | GATA binding protein 4 |
| NM_008130 | *Gli3* | GLI-Kruppel family member GLI3 |
| NM_020567 | *Gmnn* | geminin |
| NM_026496 | *Grhl2* | grainyhead-like 2 (Drosophila) |
| NM_008228 | *Hdac1* | histone deacetylase 1 |
| NM_001130416 | *Hdac6* | histone deacetylase 6 |
| NM_008234 | *Hells* | helicase, lymphoid specific |
| NM_026748 | *Ints1* | integrator complex subunit 1 |
| NM_010578 | *Itgb1* | integrin beta 1 (fibronectin receptor beta) |
| NM_001048177 | *Jak2* | Janus kinase 2 |
| NM_001003953 | *Kdm2b* | lysine (K)-specific demethylase 2B |
| NM_001038695 | *Kdm3a* | lysine (K)-specific demethylase 3A |
| NM_152895 | *Kdm5b* | lysine (K)-specific demethylase 5B |
| NM_001122733 | *Kit* | kit oncogene |
| NM_009769 | *Klf5* | Kruppel-like factor 5 |
| NM_026148 | *Lims1* | LIM and senescent cell antigen-like domains 1 |
| NM_145833 | *Lin28a* | lin-28 homolog (C. elegans) |
| NM_011162 | *Mapk8ip1* | mitogen-activated protein kinase 8 interacting protein 1 |
| NM_025315 | *Med21* | mediator complex subunit 21 |
| NM_008584 | *Meox2* | mesenchyme homeobox 2 |
| NM_001081049 | *Mll1* | myeloid/lymphoid or mixed-lineage leukemia 1 |
| NM_023773 | *Mphosph8* | M-phase phosphoprotein 8 |
| NM_028016 | *Nnanog* | similar to Nanog homeobox; Nanog homeobox |
| NM_001081475 | *Nasp* | nuclear autoantigenic sperm protein (histone-binding); similar to nuclear autoantigenic sperm protein; NASP |
| NM_172268 | *Nup214* | nucleoporin 214 |
| NM_001113213 | *Odf2* | outer dense fiber of sperm tails 2; similar to outer dense fiber of sperm tails 2 |
| NM_011045 | *PcnA* | proliferating cell nuclear antigen; similar to proliferating cell nuclear antigen (DNA polymerase delta auxiliary protein) |
| NM_011072 | *Pfn1* | profilin 1 |
| NM_021308 | *Piwil2* | piwi-like homolog 2 (Drosophila) |
| NM_008891 | *Pnn* | pinin |
| NM_011871 | *Prkra* | protein kinase, interferon inducible double stranded RNA dependent activator |
| NM_013768 | *Prmt5* | protein arginine N-methyltransferase 5 |
| NM_134129 | *Prpf19* | PRP19/PSO4 pre-mRNA processing factor 19 homolog (S. cerevisiae) |
| NM_012025 | *Racgap1* | Rac GTPase-activating protein 1; predicted gene 1859 |
| NM_001166409 | *Rbm3* | predicted gene 15453; RNA binding motif protein 3 |
| NM_009055 | *Rfx1* | regulatory factor X, 1 (influences HLA class II expression) |
| NM_023133 | *Rps19* | predicted gene 4327; predicted gene 8683; similar to 40S ribosomal protein S19; predicted gene 4510; predicted gene 13143; predicted gene 9646; ribosomal protein S19; predicted gene 9091; predicted gene 6636; predicted gene 14072 |
| NM_175303 | *Sall4* | sal-like 4 (Drosophila) |
| NM_030241 | *Setd8* | SET domain containing (lysine methyltransferase) 8; predicted gene 8590 |
| NM_001159589 | *Sirt1* | sirtuin 1 (silent mating type information regulation 2, homolog) 1 (S. cerevisiae) |
| NM_153056 | *Sirt7* | sirtuin 7 (silent mating type information regulation 2, homolog) 7 (S. cerevisiae) |
| NM_001039090 | *Skil* | SKI-like |
| NM_011417 | *Smarca4* | SWI/SNF related, matrix associated, actin dependent regulator of chromatin, subfamily a, member 4 |
| NM_001039233 | *Smarca5* | predicted gene 13034; SWI/SNF related, matrix associated, actin dependent regulator of chromatin, subfamily a, member 5 |
| NM_011427 | *Snail1* | snail homolog 1 (Drosophila) |
| NM_009222 | *Snap23* | synaptosomal-associated protein 23; similar to Synaptosomal-associated protein 23 (SNAP-23) (Vesicle-membrane fusion protein SNAP-23) (Syndet) |
| NM_009238 | *Sox4* | SRY-box containing gene 19; SRY-box containing gene 4 |
| NM_001085370 | *Speg* | SPEG complex locus |
| NM_011514 | *Suv39H1* | suppressor of variegation 3-9 homolog 1 (Drosophila) |
| NM_022015 | *Taf8* | TAF8 RNA polymerase II, TATA box binding protein (TBP)-associated factorq |
| NM_009335 | *Tcfap2c* | transcription factor AP-2, gamma |
| NM_001080979 | *Tead4* | TEA domain family member 4 |
| NM_016897 | *Timm23* | predicted gene 10171; translocase of inner mitochondrial membrane 23 homolog (yeast); predicted gene 7493; predicted gene 10273; predicted gene 10233 |
| NM_027194 | *Tm2d2* | TM2 domain containing 2 |
| NM_026775 | *Tmed10* | transmembrane emp24-like trafficking protein 10 (yeast); predicted gene 4024 |
| NM_144925 | *Tnrc6a* | trinucleotide repeat containing 6a |
| NM_009054 | *Trim27* | tripartite motif-containing 27 |
| NM_001081362 | *Trrap* | transformation/transcription domain-associated protein |
| NM_134024 | *Tubg1* | tubulin, gamma 1 |
| NM_011657 | *Tulp3* | tubby-like protein 3 |
| NM_009458 | *Ube2b* | ubiquitin-conjugating enzyme E2B, RAD6 homology (S. cerevisiae) |
| NM_009503 | *Vcp* | similar to Transitional endoplasmic reticulum ATPase (TER ATPase) (15S Mg(2+)-ATPase p97 subunit) (Valosin-containing protein) (VCP); valosin containing protein |
| NM_001168281 | *Wwtr1* | WW domain containing transcription regulator 1 |

* Genes are associated to pre-implantation stages of development according to knockout models or reference in the literature.

**References to supplementary materials**

1 J. T. Blitzer, and R. Nusse, 'A Critical Role for Endocytosis in Wnt Signaling', *Bmc Cell Biology,* 7 (2006).

2 M. B. Butterworth, R. S. Edinger, H. Ovaa, D. Burg, J. P. Johnson, and R. A. Frizzell, 'The Deubiquitinating Enzyme Uch-L3 Regulates the Apical Membrane Recycling of the Epithelial Sodium Channel', *J Biol Chem,* 282 (2007), 37885-93.

3 P. M. Campbell, and M. Szyf, 'Human DNA Methyltransferase Gene Dnmt1 Is Regulated by the Apc Pathway', *Carcinogenesis,* 24 (2003), 17-24.

4 A. Chatr-Aryamontri, B. J. Breitkreutz, S. Heinicke, L. Boucher, A. Winter, C. Stark, J. Nixon, L. Ramage, N. Kolas, L. O'Donnell, T. Reguly, A. Breitkreutz, A. Sellam, D. Chen, C. Chang, J. Rust, M. Livstone, R. Oughtred, K. Dolinski, and M. Tyers, 'The Biogrid Interaction Database: 2013 Update', *Nucleic Acids Res,* 41 (2013), D816-23.

5 F. Colland, X. Jacq, V. Trouplin, C. Mougin, C. Groizeleau, A. Hamburger, A. Meil, J. Wojcik, P. Legrain, and J. M. Gauthier, 'Functional Proteomics Mapping of a Human Signaling Pathway', *Genome Res,* 14 (2004), 1324-32.

6 W. B. de Lau, B. Snel, and H. C. Clevers, 'The R-Spondin Protein Family', *Genome Biol,* 13 (2012), 242.

7 A. Glinka, C. Dolde, N. Kirsch, Y. L. Huang, O. Kazanskaya, D. Ingelfinger, M. Boutros, C. M. Cruciat, and C. Niehrs, 'Lgr4 and Lgr5 Are R-Spondin Receptors Mediating Wnt/Beta-Catenin and Wnt/Pcp Signalling', *EMBO Rep,* 12 (2011), 1055-61.

8 S. Grimsby, H. Jaensson, A. Dubrovska, M. Lomnytska, U. Hellman, and S. Souchelnytskyi, 'Proteomics-Based Identification of Proteins Interacting with Smad3: Srebp-2 Forms a Complex with Smad3 and Inhibits Its Transcriptional Activity', *Febs Letters,* 577 (2004), 93-100.

9 B. Han, X. H. Bai, M. Lodyga, J. Xu, B. B. Yang, S. Keshavjee, M. Post, and M. Liu, 'Conversion of Mechanical Force into Biochemical Signaling', *J Biol Chem,* 279 (2004), 54793-801.

10 S. Horvath, B. Zhang, M. Carlson, K. V. Lu, S. Zhu, R. M. Felciano, M. F. Laurance, W. Zhao, S. Qi, Z. Chen, Y. Lee, A. C. Scheck, L. M. Liau, H. Wu, D. H. Geschwind, P. G. Febbo, H. I. Kornblum, T. F. Cloughesy, S. F. Nelson, and P. S. Mischel, 'Analysis of Oncogenic Signaling Networks in Glioblastoma Identifies Aspm as a Molecular Target', *Proc Natl Acad Sci U S A,* 103 (2006), 17402-7.

11 I. Kim, W. J. Pan, S. A. Jones, Y. X. Zhang, X. W. Zhuang, and D. Q. Wu, 'Clathrin and Ap2 Are Required for Ptdins(4,5)P-2-Mediated Formation of Lrp6 Signalosomes', *Journal of Cell Biology,* 200 (2013), 419-28.

12 J. C. Kim, J. L. Badano, S. Sibold, M. A. Esmail, J. Hill, B. E. Hoskins, C. C. Leitch, K. Venner, S. J. Ansley, A. J. Ross, M. R. Leroux, N. Katsanis, and P. L. Beales, 'The Bardet-Biedl Protein Bbs4 Targets Cargo to the Pericentriolar Region and Is Required for Microtubule Anchoring and Cell Cycle Progression', *Nat Genet,* 36 (2004), 462-70.

13 W. Kim, E. J. Bennett, E. L. Huttlin, A. Guo, J. Li, A. Possemato, M. E. Sowa, R. Rad, J. Rush, M. J. Comb, J. W. Harper, and S. P. Gygi, 'Systematic and Quantitative Assessment of the Ubiquitin-Modified Proteome', *Molecular Cell,* 44 (2011), 325-40.

14 N. Kouprina, A. Pavlicek, N. K. Collins, M. Nakano, V. N. Noskov, J. Ohzeki, G. H. Mochida, J. I. Risinger, P. Goldsmith, M. Gunsior, G. Solomon, W. Gersch, J. H. Kim, J. C. Barrett, C. A. Walsh, J. Jurka, H. Masumoto, and V. Larionov, 'The Microcephaly Aspm Gene Is Expressed in Proliferating Tissues and Encodes for a Mitotic Spindle Protein', *Hum Mol Genet,* 14 (2005), 2155-65.

15 I. Kouranti, J. R. McLean, A. Feoktistova, P. Liang, A. E. Johnson, R. H. Roberts-Galbraith, and K. L. Gould, 'A Global Census of Fission Yeast Deubiquitinating Enzyme Localization and Interaction Networks Reveals Distinct Compartmentalization Profiles and Overlapping Functions in Endocytosis and Polarity', *PLoS Biol,* 8 (2010).

16 H. S. Kwon, H. S. Lee, Y. Ji, J. S. Rubin, and S. I. Tomarev, 'Myocilin Is a Modulator of Wnt Signaling', *Molecular and Cellular Biology,* 29 (2009), 2139-54.

17 N. R. Mtango, M. Sutovsky, A. Susor, Z. Zhong, K. E. Latham, and P. Sutovsky, 'Essential Role of Maternal Uchl1 and Uchl3 in Fertilization and Preimplantation Embryo Development', *J Cell Physiol,* 227 (2012), 1592-603.

18 SY Peng, SY Lin, and HC Hsu, 'Aspm (Asp (Abnormal Spindle) Homolog, Microcephaly Associated (Drosophila))', in *Atlas Genet Cytogenet Oncol Haematol* (2009).

19 B. Plusa, S. Frankenberg, A. Chalmers, A. K. Hadjantonakis, C. A. Moore, N. Papalopulu, V. E. Papaioannou, D. M. Glover, and M. Zernicka-Goetz, 'Downregulation of Par3 and Apkc Function Directs Cells Towards the Icm in the Preimplantation Mouse Embryo', *J Cell Sci,* 118 (2005), 505-15.

20 Y. Qian, J. M. Baisden, L. Cherezova, J. M. Summy, A. Guappone-Koay, X. Shi, T. Mast, J. Pustula, H. G. Zot, N. Mazloum, M. Y. Lee, and D. C. Flynn, 'Pc Phosphorylation Increases the Ability of Afap-110 to Cross-Link Actin Filaments', *Mol Biol Cell,* 13 (2002), 2311-22.

21 A. J. Ross, H. May-Simera, E. R. Eichers, M. Kai, J. Hill, D. J. Jagger, C. C. Leitch, J. P. Chapple, P. M. Munro, S. Fisher, P. L. Tan, H. M. Phillips, M. R. Leroux, D. J. Henderson, J. N. Murdoch, A. J. Copp, M. M. Eliot, J. R. Lupski, D. T. Kemp, H. Dollfus, M. Tada, N. Katsanis, A. Forge, and P. L. Beales, 'Disruption of Bardet-Biedl Syndrome Ciliary Proteins Perturbs Planar Cell Polarity in Vertebrates', *Nat Genet,* 37 (2005), 1135-40.

22 E. Sanchez-Tillo, O. de Barrios, L. Siles, M. Cuatrecasas, A. Castells, and A. Postigo, 'Beta-Catenin/Tcf4 Complex Induces the Epithelial-to-Mesenchymal Transition (Emt)-Activator Zeb1 to Regulate Tumor Invasiveness', *Proc Natl Acad Sci U S A,* 108 (2011), 19204-9.

23 P. K. Sengupta, M. P. Bouchie, and M. A. Kukuruzinska, 'N-Glycosylation Gene Dpagt1 Is a Target of the Wnt/Beta-Catenin Signaling Pathway', *J Biol Chem,* 285 (2010), 31164-73.

24 Y. M. Yamashita, D. L. Jones, and M. T. Fuller, 'Orientation of Asymmetric Stem Cell Division by the Apc Tumor Suppressor and Centrosome', *Science,* 301 (2003), 1547-50.

25 Y. J. Yi, G. Manandhar, M. Sutovsky, R. Li, V. Jonakova, R. Oko, C. S. Park, R. S. Prather, and P. Sutovsky, 'Ubiquitin C-Terminal Hydrolase-Activity Is Involved in Sperm Acrosomal Function and Anti-Polyspermy Defense During Porcine Fertilization', *Biol Reprod,* 77 (2007), 780-93.

26 X. Zhong, L. Liu, A. Zhao, G. P. Pfeifer, and X. Xu, 'The Abnormal Spindle-Like, Microcephaly-Associated (Aspm) Gene Encodes a Centrosomal Protein', *Cell Cycle,* 4 (2005), 1227-9.
